# Supplementary material
Source: publisher site journal article supplement (https://www.dovepress.com/article/256858)
Supplement: Supplementary file 1 [file get_supplementary_file.php]

**Supplemental Table S1.** *PAX4* primers sequences

| **Oligo** | **Primer sequences (5'-3')** | **Base pair** | **T (°C)** |
| --- | --- | --- | --- |
| PAX4.1F | gggtatgggcaaggaacaaa | 493 | 60 |
| PAX4.1R | ccccttttcaacctccgaga |
| PAX4.2F | tggcctggtccagtaagtct | 509 | 60 |
| PAX4.2R | gctttctccttcccaatcct |
| PAX4.3F | aggattgggaaggagaaagca | 473 | 63 |
| PAX4.3R | gggacctgtgttctgttcca |
| PAX4.4F | ggtattgagcaccctttcca | 415 | 60 |
| PAX4.4R | cactcacacctgcacctctc |
| PAX4.5F | gtttggggttgtagcaggtg | 418 | 60 |
| PAX4.5R | ccctccctgctctagctttt |
| PAX4.6F | tcttccccaacccaaacctt | 301 | 60 |
| PAX4.6R | gatagatgactgagcgggca |
| PAX4.7F | aaggacctgtcttggggaag | 312 | 60 |
| PAX4.7R | gctcaggccagaaatggaag |
| PAX4.8F | atactacttgggtggcaggc | 502 | 60 |
| PAX4.8R | gggagagaggctgagacatc |
| PAX4.9F | cagggtgggaaactgatgtc | 447 | 60 |
| PAX4.9R | gtgagaagtgggtgggtgtt |
